25 **Abstract**

26 During development, organs must form with precise shapes and sizes. Organ morphology  
27 is not always obtained through growth; a classic counterexample is condensation of the  
28 nervous system during *Drosophila* embryogenesis. The mechanics underlying such  
29 condensation remain poorly understood. Here, we combine *in toto* live-imaging,  
30 biophysical and genetic perturbations, and atomic force microscopy to characterize the  
31 condensation of the *Drosophila* ventral nerve cord (VNC) during embryonic development  
32 at both subcellular and tissue scales. This analysis reveals that condensation is not a  
33 unidirectional continuous process, but instead occurs through oscillatory contractions  
34 alternating from anterior and posterior ends. The VNC mechanical properties spatially  
35 and temporally vary during its condensation, and forces along its longitudinal axis are  
36 spatially heterogeneous, with larger ones exerted between neuromeres. We demonstrate  
37 that the process of VNC condensation is dependent on the coordinated mechanical  
38 activities of neurons and glia. Finally, we show that these outcomes are consistent with a  
39 viscoelastic model of condensation, which incorporates time delays due to the different  
40 time scales on which the mechanical processes act, and effective frictional interactions.  
41 In summary, we have defined the complex and progressive mechanics driving VNC  
42 condensation, providing insights into how a highly viscous tissue can autonomously  
43 change shape and size.

44 “What utilitarian goal has nature pursued in forcing nervous system differentiation to  
45 these lengths?

46 The refinement and enhancement of reflex activity, which protects the life of both the  
47 individual and the species” (Cajal, 1899).

48

## 49 **INTRODUCTION**

50

51 Morphogenesis proceeds as a result of changes in cells proliferation, adhesion,  
52 differentiation and survival, and it is also the subject of mechanical inputs (Hogan, 1999)  
53 (Zhang and Labouesse, 2012) (Weber et al., 2011) (Heisenberg and Bellaïche, 2013).

54 Further, during ontogenesis, all organs develop in synchrony to reach physiological  
55 optimization (Oliveira et al., 2014). In this scenario, how mechanics influences the final  
56 shape or size of an organ remains far from clear (Heisenberg and Bellaïche, 2013; LeGoff  
57 and Lecuit, 2015; Saunders and Ingham, 2019). A critical issue is that mechanical  
58 processes must be highly coordinated, while also accounting for geometric and scaling  
59 constraints (Amourda and Saunders, 2017).

60

61 Biological tissues display both elastic and viscous properties and are, in many cases,  
62 mechanically heterogeneous both in space and time (Serwane et al., 2017). They are  
63 constituted by active materials, and so standard equilibrium biophysical approaches are  
64 often insufficient to describe their behaviors. The material properties of tissues are thus  
65 key for the development of the organism (Mammoto and Ingber, 2010) (Miller and  
66 Davidson, 2013) (Mongera et al., 2018). However, understanding how the material  
67 properties of tissues impact the building and shaping of organs during development  
68 remains an open question.

69

70 Precise tissue organization is especially relevant when considering the functional  
71 complexity of the Central Nervous System (CNS) (Redies and Puelles, 2001). The  
72 complex architecture of the mature CNS is achieved through a well-known sequence of  
73 cellular events (Roig-Puiggros et al., 2020) (Tessier-Lavigne and Goodman, 1996). At  
74 the local level, tension forces contribute to the formation and maintenance of active

75 synapses and the stabilization of neurites (Anava et al., 2009) (Kilinc, 2018). They also  
76 influence the shortening of neuronal processes, thus contributing to circuitry compactness  
77 (Franze, 2013). However, it is unknown which mechanical processes at the tissue-scale  
78 are involved in the spatial organization of neural architecture.

79

80 Here we fill this knowledge gap by determining how mechanical forces - generated at  
81 different scales - translate into tissue level sculpting of the entire *Drosophila* embryonic  
82 ventral nerve cord (VNC), as manifested by its pronounced shortening during  
83 condensation. The embryonic CNS is built stepwise by neuroblasts that delaminate from  
84 the embryonic neurectoderm in an invariant pattern, generating a diverse population of  
85 neurons and glia (Hartenstein and Wodarz, 2013). Neurons are unipolar and project their  
86 axons towards the neuropil. Cohesive axon bundles travel together and branch in the same  
87 or closely adjacent neuropil compartments creating stereotyped segmental structures  
88 (Landgraf et al., 2003) (Technau, 2008). Axon tracts include three longitudinal  
89 connectives that pioneer the neuropil of the VNC, and transverse pioneer commissures  
90 establishing contralateral connections (Lin et al., 1994). Neurons are supported by a  
91 complex scaffold of glia, which creates a meshwork of cortex processes required for  
92 stabilizing neurons' positions (Beckervordersandforth et al., 2008). Only by integrating  
93 knowledge of the action of specific cell types along with long range mechanical forces  
94 can we begin to build a coherent model of tissue condensation.

95

96 Macroscopically, the VNC is formed along the extended germ band and exhibits a  
97 dramatic late shortening that further progresses in larval stages (Campos-Ortega and  
98 Hartenstein, 1985) (Page and Olofsson, 2008) (Olofsson and Page, 2005). It more than  
99 halves in length during the late embryonic stages. From an architectural viewpoint, the  
100 mechanisms modulating how the CNS gets shaped and how its composing elements are  
101 brought together into a mechanically stable functional structure are unknown.

102

103 To analyze the VNC condensation dynamics across multiple scales, we used four-  
104 dimensional confocal and light-sheet microscopy along with advanced image analysis.  
105 Velocity and strain maps revealed a complex morphogenetic kinematic, comprising  
106 alternate active and passive periods. Condensation during the active phases proceeds

107 centripetally from both ends of the VNC and exhibits local oscillatory behavior. Further,  
108 spatial and temporal quantifications of material stiffness showed that the VNC displays a  
109 correlative, segmentally iterated, tensional landscape and stereotyped material stiffness  
110 inhomogeneities. To explain how these properties drive periodic oscillations, we built a  
111 viscoelastic model that revealed that they are consistent with having different viscous and  
112 elastic mechanical behaviors during tissue condensation. The combined experimental and  
113 theory results show that large-scale mechanical forces are essential for condensing and  
114 shaping the VNC. We assigned the ultimate acquisition of the VNC final shape and the  
115 generation of global force patterns to the concerted actions at a cellular scale of neurons  
116 and glia through the dynamic modulation of their cytoskeleton. Overall, this work reveals  
117 that the nervous system behaves as a solid viscoelastic tissue during condensation and  
118 that its biomechanical properties are key, in concurrence with a complex series of  
119 coordinated cellular actions, for its morphogenesis.

120

121

## 122 **RESULTS**

123

### 124 **VNC condensation dynamics**

125 To understand the mechanics underlying condensation at the global tissue scale we  
126 characterized its progression *in vivo*, from the initiation of germ band retraction to larval  
127 hatching. Midway through embryogenesis, the *Drosophila* VNC undergoes dramatic  
128 condensation along the AP axis, shortening from over 700 to less than 250  $\mu\text{m}$  (**Figure**  
129 **S1** and **Movie S1**). This process depends on different cellular events: the remodeling of  
130 the extracellular matrix (ECM) by hemocytes; the cytoskeletal dynamics of glia and  
131 neurons; and regulated apoptosis (Olofsson and Page, 2005) (Page and Olofsson, 2008)  
132 (Evans et al., 2010). We live-imaged Fasciclin 2 (Fas2)-GFP embryos (Buszczak et al.,  
133 2007) by confocal microscopy and embryos expressing the nuclear marker Histone2A-  
134 mCherry by light-sheet microscopy (Krzic et al., 2012). To reconstruct the VNC three-  
135 dimensional morphology from stage 16 onwards we had to overcome the movements  
136 undertaken by embryos. We employed an image processing pipeline that “detwitched”  
137 embryos by digitally re-locating the VNC along the central midline at each time-point  
138 from *in toto* light-sheet images (**Figure 1A**, **Movie S2** and Experimental Procedures).

139

140 We generated length and velocity profiles for the VNC throughout condensation (**Figure**  
141 **1B**). These revealed that condensation proceeds in five dynamic steps. First, the VNC  
142 pulls back in association with the retraction of the germ band until its posterior end  
143 positions near the posterior tip of the embryo (compaction phase 1 – CP1). The  
144 condensation speed in this phase follows that of the germ band, which is variable at first  
145 and sustained later (Lynch et al., 2013). Second, the VNC reaches an almost stationary  
146 phase by the end of germ band retraction (end of stage 13). This phase lasts for around  
147 two hours at 25°C, up to the end of dorsal closure and head involution by late stage 15  
148 (pausing phase 1 – PP1). Third, the VNC, uncoupled from the epidermis and mesoderm,  
149 rapidly initiates contraction (compaction phase 2 – CP2). Fourth, condensation reaches a  
150 second resting period of around two hours (pausing phase 2 – PP2). Fifth and last, the  
151 VNC undergoes a final slow progressive compaction, concurrent with peristaltic embryo  
152 movements, up to the end of stage 17 (compaction phase 3 – CP3). Variability in VNC  
153 length between embryos along the whole process is very small (<10%) except during the  
154 germ band retraction-associated CP1, indicating that VNC condensation is a robust  
155 process structured in alternating active and passive phases (**Figure 1B**).

156

### 157 **VNC condensation is oscillatory**

158 Initially, condensation of the emerging VNC passively follows the movements of the  
159 germ band. The successive autonomous phases of contraction are, on the other hand,  
160 active processes. We undertook a comprehensive analysis of these later steps by  
161 quantifying, using particle image velocimetry (PIV) (Vig et al., 2016), the local velocities  
162 along the whole length of the VNC as it condenses (phases CP2, PP2 and CP3) (**Figure**  
163 **1C**, **Movie S2**). Remarkably, we found that, after head involution, condensation is  
164 oscillatory, both during the CP2 and CP3 phases, with contractile periods on a time scale  
165 of around 30 minutes. The frequency of the oscillations is quite regular, while their  
166 amplitude is temporally varying. Contractile oscillations are observed at the anterior and,  
167 most prominently, at the posterior of the VNC with opposing directionalities (**Figure 1C**).  
168 They lead to the bidirectional convergence of the VNC towards a central stationary  
169 domain located between the third thoracic and the first abdominal segments (**Figure 1D**  
170 and **Movie S3**).

171

172 In summary, the late active shortening periods of VNC condensation are not monotonic.  
173 Tissue-scale oscillations suggest a sophisticated spatiotemporal mechanical coordination  
174 across the whole tissue.

175

176 **Material properties of the VNC vary both spatially and temporally during**  
177 **development**

178 The unexpected complex kinematics of condensation hints to potential spatiotemporal  
179 changes in VNC material properties. To characterize VNC stiffness during condensation  
180 across time and in different parts of the tissue we used Atomic Force Microscopy (AFM).  
181 The elastic Young's modulus (E), a stiffness proxy, was measured segment-to-segment  
182 at the midline and at the lateral neuropile of stage 14 and late stage 16 embryos (**Figure**  
183 **2A-C** and Experimental Procedures).

184

185 At stage 14 of embryogenesis (PP1 phase), before the VNC active contractions initiate,  
186 E was  $0.08 \pm 0.01$  KPa (mean  $\pm$  SD, n=15) in the midline, and  $0.06 \pm 0.01$  KPa in the  
187 lateral regions (abdominal segments 1 to 5) (**Figure 2B**). No statistical differences were  
188 found either between midline and lateral positions or along the AP axis ( $p > 0.05$ ). At late  
189 stage 16 (late CP2), the midline stiffness increased significantly in comparison to the  
190 lateral cortex area to stage 14 ( $p < 10^{-3}$ ). E in the midline was  $0.17 \pm 0.03$  KPa and  $0.06$   
191  $\pm 0.02$  KPa (n=15) in the lateral regions. We also found that stiffness varied along the AP  
192 axis (**Figure 2C**); the anterior region was stiffer, with a dramatic decrease towards the  
193 most posterior segments (see also **Figure S2**).

194

195 Therefore, consistent with previous measurements in neural tissues from different  
196 organisms or from individual neurons (Spedden and Staii, 2013), the *Drosophila*  
197 embryonic VNC is extremely soft. Our results indicate that the neural tissue stiffens with  
198 time in an axially graded fashion. The central domain of the embryonic VNC, where most  
199 axons bundle, becomes more rigid than the lateral domains, where the somata are  
200 predominantly located.

201

## 202 **The tensional landscape of the VNC is temporally and spatially patterned**

203 To infer large tissue scale forces, we determined local strain rates. Strain rates measure  
204 how rapidly neighboring regions move relative to each other within a given domain  
205 (Petridou and Heisenberg, 2019). They are related to the resulting tissue stresses, which  
206 also depend on the viscoelastic tissue properties; its bulk viscosity and the local shear rate  
207 (Experimental Procedures). The strain rate maps reveal that tissue deformations get  
208 restricted to specific subdomains as the VNC condenses (**Figure 2D** and **Movie S2**). At  
209 the active CP2 and CP3 phases, the strain rates display alternating positive and negative  
210 values along the AP axis. The strain rate has a distinct change in magnitude immediately  
211 after the second pause phase, before slowly tending back towards zero. Distinct strain rate  
212 domains appear to correspond to discrete contractile regions iteratively repeated along  
213 the VNC. Direct measurements of the distances in between inter- and intra-commissural  
214 domains show that the contractile regions map to the space between the posterior  
215 commissure of one neuromere and the anterior commissure of the next  
216 (intercommissural) (**Figure 2E**).

217

218 Together, the strain rates maps and AFM data indicate that the VNC is mechanically  
219 organized in repeating units, and its mechanical landscape is temporally modulated. To  
220 confirm these propositions, we studied the response to mechanical perturbation of the  
221 VNC during condensation. We utilized laser microsurgery to sever the VNC at specific  
222 times and positions (**Figure 3A**, **Figure S3A** and Experimental Procedures). Cutting  
223 transversally to the AP axis in the intercommissural domains between the abdominal  
224 neuromeres of stage 11-14 embryos resulted in an isotropic recoil faster than in  
225 intracommissural (neuromere) regions (**Figure 3B**, **Figure S3B** and **Movie S4**). Our data  
226 suggest that the intercommissural domains are under significantly higher tension than the  
227 intracommissural during the stationary phase (PP1). By contrast, during the late  
228 condensation phase (CP2/PP2 - stages 16-17), tissue recoil after cutting was essentially  
229 lost (**Figure 3C**). Importantly, severing an individual intercommissural space does not  
230 affect adjacent neuromeres that continue to condense (**Figure 3D** and **Movie S5**); they  
231 act as apparently independent units.

232

233 Laser cuts also enable an approximate characterization of the viscoelastic properties of



234 the VNC by analyzing the recoil rate (see Experimental Procedures). Though we cannot  
235 discount possible viscous differences between the inter- and intracommissural domains,  
236 such potential variations are likely negligible as their tissue composition is equivalent.  
237 By severing the intercommissural domains at different time points we found a strong  
238 reduction of contractility and viscosity as the VNC condenses (**Figure 3E**).

239

240 To evaluate the stress evolution along the VNC during condensation, we constructed a  
241 three-dimensional Finite Element model (FE). We mapped the measured velocity field  
242 onto the FE model and reconstructed the strain and stress fields along the VNC (**Figure**  
243 **3F**, **Figure S3C-D**, **Movie S6** and Experimental Procedures). The evolution of the stress  
244 profiles along the AP-axis and the superposition of the stress minima (compression) onto  
245 the phase contrast kymographs, confirmed that maximum compression is sustained at the  
246 intracommissural domains. Further, the active stress increased over time in the  
247 intercommissures during the autonomous condensation phase (**Figure S3E**). This  
248 observation points to a potential scenario in which the distribution of tension reflects the  
249 spaced contractions of the tissue (segments contract as units), and subsequently the  
250 progression of condensation.

251

## 252 **Oscillations are an emergent property of a viscoelastic tissue**

253 The contraction of the intercommissural domains in between neuromeres explains the  
254 condensation of the VNC, but how do they coordinate? Can this coordination explain the  
255 origin of the global oscillations? To tackle these problems, we developed a one-  
256 dimensional rheological model that incorporates the essential viscoelastic properties of  
257 the VNC along with a delayed active contractility. At a particular time,  $t$ , the VNC is  
258 taken to have a rest length,  $L(t)$ . This internal variable depends on time, as the system  
259 gradually condenses. The actual length of the VNC at a particular time,  $l(t)$ , can differ  
260 from  $L(t)$  due to tissue relaxation, active reorganization and stress acting on the system.  
261 We define  $\Delta L=l(t)-L(t)$ , representing the difference in VNC length from its rest length at  
262 time  $t$ . Using this, we can represent the change in the rest length as a function of time by

$$263 \quad \frac{dL}{dt} = \gamma \Delta L(t - \delta t) \quad \text{Eq. (1)}$$

264 where  $\gamma$  is the remodelling rate, which measures the rate at which the tissue adapts its  
265 rest-length. The time delay,  $\delta t$  in Eq. (1) represents the delay between the current strain  
266 measure  $\Delta L$  and the active remodeling of the VNC through its rest-length  $L$ . The VNC  
267 condenses within the densely packed environment of the embryo, it is surrounded by the  
268 neural lamella (Meyer et al., 2014) and it is connected early on to the underlying epithelia  
269 and later by intersegmental and segmental nerves to the developing muscles and  
270 peripheral sensory organs. We also incorporate potential effects of surrounding tissues in  
271 the model. We added to the rheology a frictional term proportional to the apparent VNC  
272 length rate  $dl/dt$ ,

$$273 \quad -\eta \frac{dl(t)}{dt} = k_1 \cdot \Delta l(t) + k_2 \cdot \Delta L(t) \quad \text{Eq. (2)}$$

274 where  $\eta$  is the friction coefficient,  $k_1$  is the purely elastic component of the VNC,  
275  $\Delta l(t) = l(t) - l_0(t)$  (where  $l_0$  is the characteristic elastic length scale), and  $k_2$  represents  
276 the stiffness of the viscoelastic component of the VNC, with a dynamic rest-length  $L(t)$ .  
277 (**Figure 4A**). The combination of Eqs. (1) and (2) yields a viscoelastic model with a  
278 delayed viscous response, which has the ability to exhibit oscillatory behavior (Muñoz et  
279 al., 2018).

280

281 Similar rest-length models have recently been used in the context of embryogenesis  
282 (Cavanaugh et al., 2020) (Dobrovinski et al., 2017) (Sumi et al., 2018), epithelia  
283 remodeling (Clement et al., 2017) (Staddon et al., 2019) and stress relaxation of  
284 monolayers (Khalilgharibi et al., 2019). However, the stability of the model with the delay  
285 rheology in Eq. (1) has only been analyzed in the absence of environmental viscous  
286 effects (Muñoz et al., 2018). Eqs. (1)-(2) form a system of Delay Differential Equations  
287 that can be analyzed through their characteristic equation (Stépán, 1989) (Erneux, 2009)  
288 or numerically. Depending on the parameters  $\eta$ ,  $\gamma$ ,  $\delta t$ ,  $k_1$  or  $k_2$ , the apparent length  $l(t)$  can  
289 exhibit a stable regime (with no oscillations or oscillations showing a diminishing  
290 amplitude) or unstable oscillations (with increasing amplitude). The phase diagram in  
291 **Figure 4B** shows that decreasing values of  $k_2$  and  $\gamma$  render the system unstable, while  
292 decreasing values of viscosity  $\eta$  render the oscillations more stable. These results are  
293 consistent with the eventual stabilization of the VNC as its stiffness increases (**Figure**  
294 **2B-C**) and its viscosity is progressively reduced (**Figure 3E**). The kymograph in **Figure**  
295 **4C** shows an example of the stable oscillatory regime (see **Figure S4** for other scenarios).

296 Overall, our reduced one-dimensional model can explain the emergence of the periodic  
297 contractions as a consequence of time delays induced from the material properties of the  
298 VNC and possible effective friction between the neural cortex and the surface glia. As  
299 the VNC stiffens during development, these oscillations are stabilized, ensuring robust  
300 formation of the VNC.

301

### 302 **VNC condensation requires significant mechanical contribution from glia**

303 Can differences in material properties and emergent oscillations be connected to cell  
304 behaviors? Previous analyses of VNC condensation have defined differing roles for glial  
305 cells in the removal of dead cells, or the constriction itself (Shklyar et al., 2014) (Olofsson  
306 and Page, 2005). Considering the complex mechanics of VNC condensation, we next  
307 asked if neurons or glia – through their cellular scale actions - play a mechanically active  
308 part in modulating tissue scale behavior and, if they do, we aimed to determine their  
309 effects on the VNC material properties.

310

311 To approach these questions, we first genetically ablated either neurons or glia by  
312 overexpressing the proapoptotic gene Grim (Chen et al., 1996) employing the pan-neural  
313 Elav-Gal4 and the glia Repo-Gal4 drivers (**Figure 5A-D**). Excessive neuronal cell death  
314 heavily distorted the organization of the axonal scaffold (**Figure 5A**), and, to a lesser  
315 extent, the VNC condensation (**Figure S5A**). Though excessive glia apoptosis was not  
316 observed in this condition, glial cells mispositioned, probably in response to steric  
317 constraints resulting from alterations in axonal morphology (**Figure 5B**). Expressing Grim  
318 in glia promoted, indirectly, slight alterations in the 3D axonal scaffold (**Figure 5C**). Most  
319 of the glia were removed (**Figure 5D**) and resulted in a strong failure of the condensation  
320 process (**Figure S5A**). Loss of glia also altered the VNC shape, which was distorted in a  
321 stereotyped way (**Figure 5E** and **Movie S7**). Employing light sheet microscopy (**Figure**  
322 **S5B** and **Movie S8**) we observed that in the absence of glia, VNC condensation arrests at  
323 the last contraction phase (CP3) (**Figure 5F**). PIV analysis of VNC condensation revealed  
324 a weakly structured segmented pattern, with a substantial reduction of VNC strain rates  
325 at all time points and positions, and the loss of contractile oscillations (**Figure S5C**).

326

327 We explored by AFM whether neurons or glia modulate the VNC material properties.  
328 AFM measurements were performed at the early stationary PP1 (stage 14, **Figure 5G**)  
329 and the second active condensation CP2 phases (stage 16, **Figure 5H**) after inducing  
330 targeted cell death. Before active contraction, VNC rigidity slightly decreased at the  
331 midline after neuron ablation but it was not affected by glia depletion. On the contrary,  
332 during the active CP2 phase, significant softening upon glia removal was observed, both  
333 at the midline and at lateral positions, while neuronal ablation had no effect (**Figure 5H**).

334

335 In summary, both glia and neurons contribute to the active contraction of the VNC and  
336 modulate its material properties. However, while glia have a major contribution on both  
337 of these aspects of the condensation process, the impact of neurons appears to be more  
338 subtle; they just influence the structural organization of the neuropile and not VNC  
339 material properties.

340

#### 341 **Myosin-mediated contractility in neurons and glia is required for VNC** 342 **condensation**

343 VNC condensation is an active process demanding mechanical efforts by both neurons  
344 and glia. Yet, how is intracellular force generated within these cells and how does this  
345 translate to tissue scale effects? To evaluate the mechanical impact that the active  
346 cytoskeleton may have in condensation, we analyzed actomyosin contractility in both cell  
347 types.

348

349 Pan-neural expression of a Zipper (Zip) RNAi transgene (Non-Muscle Myosin II heavy  
350 chain) resulted in major defects in the structural scaffold of the VNC and in VNC  
351 condensation failure (**Figure 6A** and **Figure S6A**). No increase of cell death was  
352 observed. Likewise, interference with Zip expression in glia also resulted in condensation  
353 defects (**Figure S6A**). Glia looked smaller and failed to migrate properly. Neuronal  
354 longitudinal axonal tracts are found closer towards the midline (**Figure 6B**). Analyzing  
355 VNC condensation dynamics, we found that Zip knockdown led to distinct  
356 spatiotemporal alterations (**Figure 6C-E** and **Movie S9**). Abolishing neuronal  
357 contractility by depleting Zip in neurons blocks VNC condensation by affecting all phases

358 from CP2 onwards (**Figure 6D**). Interestingly, although no condensation progression was  
359 detected, segmentally iterated strain rate differences were present. On the contrary,  
360 depletion of Zip in glia resulted in cessation of condensation at the PP2 phase (**Figure**  
361 **6E**). Last, FE model analyses indicate that upon blocking contractility in glia, no apparent  
362 compression takes place in intercommissural regions, and the strain rate pattern fades  
363 away (**Figure 7A-B** and **Movies S10** and **S11**).

364

365 These data support a model in which neuronal contractile capability from within the VNC  
366 (neurons) is permissive for its compaction at all stages but it is not sufficient. The glia  
367 exerts an external compressive force at the VNC surface, spatiotemporally regulated, that  
368 exploits the segmentally iterated architectural organization of the neuronal network to  
369 accommodate the periodic tensional pattern of the VNC into oscillatory condensation  
370 events (**Figure 7C-E**).

371

372

## 373 **DISCUSSION**

374

375 Our characterization of the spatiotemporal progression of VNC condensation provides  
376 essential cues for understanding the sequential steps involved in the acquisition of the  
377 final shape of the embryonic CNS. In discussing the spatial design of the nervous system  
378 we have to consider some specific constraints: (1) first, and foremost, the organism  
379 symmetry (bilateral or radial); (2) the spatial organization of its locomotor and sensorial  
380 machinery; and (3) the need to create an integrated and connected system that links the  
381 organization of muscles and sensory organs so that impulses can be centrally controlled  
382 and coordinated (Bullmore and Sporns, 2012; Swanson, 2007). The condensation of the  
383 VNC, within the global CNS developmental plan, must satisfy these constraints. During  
384 condensation, the VNC maintains its iterated axonal connections to all segments' muscles  
385 and sensory organs.

386

387 **The condensation of the VNC is oscillatory and serves specific morphogenetic**  
388 **purposes**

389 Condensation is a common morphogenetic event (Hall and Miyake, 2000), affecting the  
390 compaction of mesenchymal tissues. Condensation plays an important role at the earliest  
391 stages of organogenesis (*e.g.* cartilage, bone, muscle and tendon) (DeLise et al., 2000)  
392 and in shaping neural ganglia, both in arthropods (Bullock and Horridge, 1965) and  
393 vertebrates (Stark et al., 1997). In most condensation cases, cells get together by  
394 migratory accretion and the final form of the tissue is acquired by sustained anisotropic  
395 cell supply or intercalary growth (Christley et al., 2007; Frenz et al., 1989; Singh and  
396 Schwarzbauer, 2012). The sequential active and passive stages, that characterize  
397 *Drosophila* VNC condensation, as reported here, have not been observed before. This  
398 complexity is probably a consequence of the specific allometric constraints that the VNC  
399 must conform to reach full functional competence (Karkali et al., 2020).

400

#### 401 **Oscillations are an emergent property of the viscoelastic character of the VNC**

402 The condensation of a tissue is the result of the spatially-patterned dynamics of its  
403 components (cells compression and/or neighbors exchanges), spanning micro- to  
404 millimeter scales. The directionality and magnitude of such patterning are critical for  
405 changes in the tissue fine structure and cell identities (Li et al., 2017) (Shyer et al., 2017).

406

407 We have found that during condensation the neural tissue material properties and  
408 tensional mechanics undergo progressive stereotyped changes (**Figures 2 and 3**). The  
409 embryonic VNC is very soft (as with other neural tissues (Franze et al., 2013)). However,  
410 its stiffness is neither constant, nor homogeneous. Further, we have revealed an iterated  
411 tensional pattern along the AP axis, that rises and falls following segmental structural  
412 landmarks. In short, condensation, along with the associated refinement of the VNC  
413 axonal network architecture, leads to a rigid structural configuration in equilibrium, in  
414 which tensional differences are smoothed out.

415

416 Up to now, the lack of suitable biophysical models has limited the study of the mechanics  
417 during tissue condensation. Here, we utilized a viscoelastic FE model to reproduce the  
418 experimental strain and stress maps. Given the temporal and spatial oscillatory behavior  
419 in the absence of any apparent external oscillatory signal, we resorted to a simple one-  
420 dimensional viscoelastic model of active VNC condensation. Our model not just mimics

421 the periodic oscillations of the VNC, but it predicts the different oscillatory regimes  
422 associated to the changes of viscous and elastic mechanical properties observed during  
423 VNC condensation (**Figure 4**). In particular, by fitting the rigidity values retrieved from  
424 the AFM measurements, our rheological model demonstrates oscillations in the absence  
425 of external oscillatory inputs. Oscillations arise as a consequence of the delayed  
426 remodeling of the tissue with respect to the compressing forces. Of course, there are  
427 multiple models that can mimic oscillatory responses, either through combining reaction-  
428 convection terms (Notbohm et al., 2016) or oscillatory polarization and alignment  
429 (Petrolli et al., 2019; Peyret et al., 2019). While we cannot discard external oscillatory  
430 inputs, we have demonstrated that the generation of oscillations can occur independently  
431 from such inputs, and that the oscillatory regime of the VNC condensation depends on its  
432 material properties and effective frictional interactions with its surroundings.

433

#### 434 **VNC condensation requires the mechanical contribution of glia and neurons**

435 Condensation is not symmetrical along the AP axis, progressing centripetally towards the  
436 thoracic/abdominal interphase (**Figure 7C-E**). VNC condensation thus bears mechanical  
437 similarities to the compaction of accordion bellows, in which each pleat corresponds to a  
438 neuromere unit. Though each “pleat” in the VNC is able to contract autonomously, they  
439 are temporally and directionally coordinated across a long-range by force continuity and  
440 balance. This results in the oscillatory regimes extending throughout the VNC. We have  
441 found that this long-range continuity is created by a precise coordination of the contractile  
442 activities of neurons and glia.

443

444 In the VNC around 60 glial cells are identified per abdominal neuromere (Ito et al., 1995).  
445 Amongst them, the Subperineurial Glia (SPG), which lies beneath the outer surface of the  
446 VNC, is responsible for establishing the blood-brain barrier (BBB) (Schwabe et al.,  
447 2017). It is known that glia integrity influences VNC condensation. The ablation of  
448 hemocytes causes severe defects in SPG morphology, resulting in VNC condensation  
449 failure (Martinek et al., 2008; Olofsson and Page, 2005). Conversely, directly interfering  
450 in the activity of Rac1 or Heartless in lateral glia also blocks condensation progression  
451 (Olofsson and Page, 2005). Hypothetically, the mechanical contribution of glia to VNC  
452 condensation may be linked to their participation in casting the BBB. Indeed, we found

453 that interfering in the contractile capability of the SPGs was sufficient to phenocopy pan-  
454 glial myosin activity depletion, both in terms of condensation (**Figure S6A**) and axon  
455 network organization (**Figure S6B**). Yet, our evaluation of the mechanical consequences  
456 of glia removal indicates that the glia does not just act as a barrier, but they also act in a  
457 manner similar to a “compression sock”, wrapping the VNC neural cortex and providing  
458 rigidity (**Figures 6 and 7**). In its absence, condensation is irregularly structured, shows a  
459 substantial reduction in its strain rates, and lacks contractile oscillations. The capability  
460 of glia to compact is strongly dependent on actomyosin contractility, and it is mainly  
461 allocated to the SPGs.

462

463 Each abdominal hemisegment of the VNC comprises around 400 neurons. Axons arrange  
464 into longitudinal connectives extending along the length of the VNC and constitute a  
465 potential force-generating source. Consistent with this proposition, the axons of  
466 longitudinal connectives loop during condensation in some metamorphic insects (Pipa,  
467 1973) and we found that the spaces in-between neuromeres evenly subside as  
468 condensation progresses. These domains, counter-intuitively, are under tensional stress  
469 at early stages, relaxing as condensation proceeds. This might imply that the axonal  
470 network resists rather than promotes AP compaction. Indeed, ablation of neurons only  
471 marginally affects VNC condensation. However, when the contractile capability of  
472 neurons was abolished, VNC condensation failed, although strain patterns were not  
473 significantly affected. This suggests that neurons are not playing a purely passive role  
474 (**Figures 6 and 7**). Indeed, the onset of the CP2 condensation stage correlates with the  
475 initiation of synaptic neural activity (Baines and Bate, 1998). Correspondingly, mutants  
476 for Syntaxin, which lack neurotransmitter release; and the pan-neural expression of either  
477 tetanus toxin or the K<sup>+</sup> channel Kir2.1 result in the inhibition of VNC condensation  
478 (Schulze et al., 1995).

479

480 Overall, this work reveals that the viscoelastic and biomechanical properties of the  
481 nervous system are key, in concurrence with a complex series of coordinated cellular  
482 actions, for its morphogenesis. The generation of force patterns, and the ultimate  
483 acquisition of the VNC final shape, can be assigned to the concerted actions of neurons  
484 and glia through the dynamic modulation of their cytoskeleton. The neuronal contractile  
485 capability is secondary to the glial compacting power, but necessary to direct VNC



486 condensation along the AP axis (**Figure 7C-E**). Finally, if we assume that VNC  
487 condensation is a way to respond to evolutionary pressure for functional optimization, we  
488 speculate that the segregation and coordination of mechanical activities between  
489 emergent neurons and glia is a key factor for natural selection.

490

491

## 492 **EXPERIMENTAL PROCEDURES**

493

### 494 ***Drosophila* Strains and Genetics**

495 The following stocks were used:

496 *w1118, fas2-GFP<sup>CB03616</sup>* (Dr. Christian Klämbt)

497 *w, elav-Gal4 [C155]* (BDSC #6923)

498 *w; ; repo-Gal4 / TM3, Sb[1]* (BL#7415)

499 *w; ; pino1::Repo-Gal4::UAS-mCD8-GFP / TM6B, Dfd-GMR-nv-YFP, Sb[1], Tb[1]* (Dr.  
500 Gerald Udolph)

501 *w; ; pino1::Repo-Gal4::UAS-mCD8-GFP:: His2Av-mRFP / TM6B, Dfd-GMR-nv-YFP,*  
502 *Sb[1], Tb[1]* (this work)

503 *w; ; pino1::elav-mCD8-GFP / TM6B, Dfd-GMR-nv-YFP, Sb[1], Tb[1]* (Dr. Gerald  
504 Udolph)

505 *w; moody-Gal4:UAS-mCD8-GFP* (Dr. Christian Klämbt)

506 *w; UAS-zipper RNAi / CyO* (BL#37480)

507 *w; His2Av-mRFP* (BL#23651)

508 *w; His2Av-mCherry* (Dr. Lars Hufnagel)

509 *w, alpha-tubulin-GFP; H2Av-mRFP* (Dr. Elena Rebollo)

510 *w; if / CyO; UAS-GRIM* (Dr. Todd Laverty)

511 In all cases, unless otherwise stated, embryos of the *w1118* strain served as controls.

512 All crosses were performed at room temperature and after 48 hours were shifted to  
513 different temperatures as the individual experiments required.

514

### 515 **Sample Preparations for Immunodetection**

516 *Drosophila* embryo dissections for generating flat preparations were performed according  
517 to (Landgraf et al., 1997). Briefly, flies maintained in apple juice-agar plates at 25°C were  
518 synchronized by repetitive changes of the juice-agar plate, with a time interval of 2 hours.  
519 All embryos laid within this time window were aged for approximately 9 hours at 29°C,  
520 or until reaching mid-stage 16 (3-part gut stage). At this point embryos were  
521 dechorionated with bleach for 1 min, poured into a mesh and rinsed extensively with  
522 water. For dissection, embryos were transferred with forceps on the surface of a small  
523 piece of double-sided tape, adhered on one of the sides of a poly-L-Lysine coated  
524 coverslip. After orienting the embryos dorsal side up and posterior end towards the center  
525 of the coverslip, the coverslip was flooded with saline (0.075 M Phosphate Buffer, pH  
526 7.2). Using a pulled glass needle the embryos were manually de-vitellinized and dragged  
527 to the center of the coverslip, where they were attached to the coated glass with their  
528 ventral side down. An incision on the dorsal side of the embryo was performed using the  
529 glass needle from the anterior to the posterior end of the embryo. The gut was removed  
530 by mouth suction and a blowing stream of saline was used to flatten their lateral  
531 epidermis. Tissue fixation was done with 3.7 % formaldehyde in saline for 10 minutes at  
532 room temperature. After this point standard immunostaining procedures were followed.

533

### 534 **Immunohistochemistry**

535 Immunostaining of flat-prepped stage 16 *Drosophila* embryos was performed using the  
536 following primary antibodies: mouse anti-Fas2 (1:100, clone 1D4, DHSB), rabbit anti-  
537 Dcp-1 (Asp216) (1:100, Cell Signaling #9578), rabbit anti-GFP tag polyclonal (1:600,  
538 Thermo Fisher Scientific) and mouse anti-Repo (1:100, clone 8D12 DHSB).

539 The secondary antibodies used for detection were: Goat anti-Rabbit IgG (H+L), Alexa  
540 Fluor 488 conjugate (A-11008), Goat anti-Rabbit IgG (H+L) Alexa Fluor 555 conjugate  
541 (A-21428), Goat anti-Mouse IgG (H+L) Alexa Fluor 488 conjugate (A-11001) and Goat

542 anti-Mouse IgG (H+L) Alexa Fluor 555 conjugate (A-21422). All secondary antibodies  
543 were used in a dilution of 1:600 and were from Invitrogen.

544

### 545 **Confocal Image Acquisition**

546 Flat-prepped immunostained embryos were mounted in Vectashield anti-fading medium  
547 (Vector Laboratories, USA). Image acquisition was performed on a Zeiss LSM 700  
548 inverted confocal microscope, using a 40 X oil objective lens (1.3 NA). Z-stacks spanning  
549 the whole VNC thickness were acquired with a step size of 1  $\mu\text{m}$ .

550 For live imaging, dechorionated stage 14 embryos were glued lateral or ventral side down  
551 on a MatTek glass bottom dish and they were covered with S100 Halocarbon Oil (Merck)  
552 to avoid desiccation. Image acquisition was performed on a Zeiss LSM 700 inverted  
553 confocal microscope, using a 25 X oil immersion lens (0.8 NA) and on a NikonA1Rsi,  
554 using a 20 X air lens (0.75 NA). Z-stacks spanning the whole VNC thickness with a 2  $\mu\text{m}$   
555 step size were acquired every 5 or 10 minutes for a total of 8-16 hours.

556

### 557 **Light-Sheet Imaging**

558 Multi-view light-sheet imaging was performed on a custom-built setup. The design and  
559 imaging capabilities are similar to systems previously described (Krzic et al., 2012).  
560 Embryos were mounted in low-melting agar (0.8% w/v) filled inside FEP tube (wall  
561 thickness 0.3 mm, inner diameter 0.5 mm, refractive index 1.3) and imaged through FEP  
562 tube submerged in sample chamber filled with PBS buffer. The sample was illuminated  
563 with a light-sheet created by two long working objectives (Olympus 10 X, 0.3 NA) on  
564 the opposite side and two orthogonal fluorescence collection objectives (Nikon, water-  
565 immersion, 25 X, 1.1NA, WD 2mm). The fluorescence signal was collected and the  
566 image formed by a tube lens (Nikon, f-200 mm) on two sCMOS cameras (Hamamatsu,  
567 ORCA-Flash4.0 V2, pixel resolution 2048 X 2048, effective pixel size at object space  
568 0.26  $\mu\text{m}$ ). 100 images were collected (z- resolution 1.8-2.6  $\mu\text{m}$ ) at 5 min time interval.  
569 Embryos were rotated 90° at each time point in order to reconstruct the full embryo  
570 morphology (see (Krzic et al., 2012) for reconstruction details).

571

## 572 **Image Processing**

573 Basic confocal image processing and analyses were performed using Fiji (Schindelin et  
574 al., 2012).

575

576 Vitelline membrane autofluorescence was removed from confocal 4D images employing  
577 an ImageJ / Fiji automated macro approach (Boix-Fabres et al., 2019).

578

579 To perform the detwisting, we first generated with Matlab effectively isotropic three-  
580 dimensional reconstructions of the embryo, at each time point, using 3D linear  
581 interpolation of the z-stack obtained from imaging the ventral side of the embryo. On a  
582 single time point, we manually identified the most anterior, posterior and ventral positions  
583 of the condensing CNS. We used the built-in Matlab 3D affine transformation function  
584 to map these points to the xy-plane of the transformed image. We then chose a reference  
585 time point at the middle of the condensation process (when the VNC was positioned  
586 ventrally) and used the *imregtform* Matlab function to align the other images. This process  
587 allowed us to suppress 3D rotations due to muscle twitching. To moderate the effect of  
588 local rapid muscle contractions, we blurred the movies in space and time (Gaussian filter,  
589 pixel size 2 in x, y and time).

590

## 591 **Atomic Force Microscopy**

592 Staged embryos were placed on top of positively charged glass slides to immobilize them  
593 on a rigid substrate. The embryos were immersed in PBS solution and dissected to expose  
594 the CNS allowing AFM measurements. Force-indentation curves were obtained with a  
595 custom-built AFM mounted on an inverted optical microscope (TE2000; Nikon). A 20  
596  $\mu\text{m}$  diameter polystyrene bead was glued to the end of a tip-less cantilever (nominal  
597 spring constant  $k=0.01$  N/m, Novascan Technologies, Ames, IA), which had previously  
598 been calibrated by thermal tune oscillation (Jorba et al., 2017). The cantilever was  
599 displaced in 3-D with nanometric resolution by means of piezo-actuators coupled to strain  
600 gauge sensors (Physik Instrumente, Karlsruhe, Germany) to measure the vertical position  
601 of the cantilever (z). The deflection of the cantilever (d) was measured with a quadrant  
602 photodiode (S4349, Hamamatsu, Japan) using the optical lever method. Before each slice

603 measurement, the slope of a deflection-displacement  $d$ - $z$  curve obtained from a bare  
604 region of the coverslip was used to calibrate the relationship between the photodiode  
605 signal and cantilever deflection. A linear calibration curve with a sharp contact point was  
606 taken as indicative of a clean undamaged tip. Force ( $F$ ) on the cantilever was computed  
607 as Hookean linear spring:

$$608 \quad F = k(d - d_0) \quad \text{Eq. (3)}$$

609 where  $k$  is the cantilever spring constant. Indentation depth  $\delta$  was defined as:

$$610 \quad \delta = (z - z_0) - (d - d_0) \quad \text{Eq. (4)}$$

611 where  $d_0$  as is the deflection offset and  $z_0$  the cantilever displacement when the tip  
612 contacts the surface of the sample.  $F$ - $z$  curves were analyzed with the Hertz contact model  
613 for a sphere indenting a semi-infinite half space:

$$614 \quad F = \frac{4E}{3(1-\nu^2)} R^{1/2} \delta^{3/2} \quad \text{Eq. (5)}$$

615 where  $R$  is the bead radius (10  $\mu\text{m}$ ),  $E$  is the Young's modulus and  $\nu$  is the Poisson's ratio  
616 (assumed to be 0.5). Eq. (3) can be expressed in terms of  $z$  and  $d$  as:

$$617 \quad d = d_0 + \frac{4E}{3k(1-\nu^2)} R^{1/2} [(z - z_0) - (d - d_0)]^{3/2} \quad \text{Eq. (6)}$$

618  $E$ ,  $z_0$  and  $d_0$  were computed for each force-indentation curve by non-linear least-squares  
619 fitting using custom built code (Matlab). The fitting was performed for the approaching  
620 force curve up to a maximum indentation of  $\sim 4 \mu\text{m}$ . At each measurement point,  $E$  was  
621 characterized as the average of the values computed from five force curves consecutively  
622 obtained with ramp amplitude of 20  $\mu\text{m}$  and frequency of 0.3 Hz. For each embryo, the  
623 Young's modulus ( $E$ ) was measured at, at least, 3 positions along the antero-posterior  
624 axis in the midline and in lateral regions (left and right separated 20  $\mu\text{m}$  from the midline).

625

## 626 **Laser Ablation**

627 Laser ablation experiments were performed on a Zeiss microscope stand equipped with a  
628 spinning disk module (CSU-X1; Yokogawa), an EMCCD camera (Andor) and a custom  
629 built laser ablation system using a 355 nm pulsed laser with energy per pulse in the 20  
630  $\mu\text{Joule}$  regime and a pulse repetition of 1000 Hz (Mayer et al., 2010).

631 Linear ablations were performed with a 50  $\mu\text{m}$  line oriented perpendicular to the VNC  
632 AP axis at different positions (intercommissural or intracommissural) between the 1<sup>st</sup>/4<sup>th</sup>  
633 abdominal segments at different embryonic stages. The laser was focused on equally  
634 spread points (shots) on the ROI, with a density of 2 shots/ $\mu\text{m}$ . For each shot, 25 laser  
635 pulses were delivered. The ablation was done in a single plane, cutting the axonal  
636 network, where the entire region of interest could be acquired. To capture the rapid recoil  
637 of the ablated front, single plane images were acquired with 50 ms exposure and with a  
638 100 ms interval between frames. Initial recoil velocity of the ablated region was computed  
639 for the estimation of mechanical stress in the tissue.

640 The images obtained from the laser ablations were analyzed using Fiji and Matlab.  
641 Kymographs were drawn on both sides (proximal- and distal) of the ablated line using  
642 the FIJI plugin Multi Kymograph (Schindelin et al., 2012). Both recoil velocities were  
643 calculated using a custom written routine in Matlab. The final recoil velocity ( $V_{\text{average}}$ ) for  
644 one ablation was computed as the average of the recoil velocities that are both proximal-  
645 oriented ( $V_{\text{proximal}}$ ) and distal-oriented ( $V_{\text{distal}}$ ):

$$646 \quad V_{\text{avg}} = (V_{\text{proximal}} + V_{\text{distal}}) / 2$$

647 We performed an exponential fitting of experimental recoil curves  $y(t)$  to a function  
648 describing the relaxation of a viscoelastic tissue

$$649 \quad y(t) = y_0 + (y_{\infty} - y_0) (1 - \exp(-t/\tau)) \quad \text{Eq. (7)}$$

650 where  $y_0$  is the initial opening,  $y_{\infty}$  measures the recoil increment (or tissue contractility)  
651 and  $\tau$  is the characteristic time which is proportional to tissue viscosity.

652

### 653 **Statistical Tests**

654 Statistical tests were performed using Matlab and estimationstats.com. Kolmogorov-  
655 Smirnov test was performed to test whether the observed values were normally  
656 distributed. When the distribution was normal, Student's t-test was performed to estimate  
657 significance of the quantities. In case the values are not normally distributed, non-  
658 parametric Mann-Whitney U-test was performed to estimate the significance of  
659 differences between the quantities. The corresponding p-values and the method used to  
660 estimate them are mentioned in the figure legends.

661

## 662 Particle Image Velocimetry (PIV)

663 Tissue displacements were analyzed by tracer particles, which in our experiments were  
664 EGFP-labeled Fas2 molecules and mCherry-labeled Histone2Av molecules. Flow fields  
665 were quantitatively measured using the open-source tool for Matlab PIVlab (Thielicke  
666 and Stamhuis, 2018). The software calculated the displacement of the tracers between  
667 pairs of images (sequential time points) using the Fast Fourier Transformation algorithm  
668 with multiple passes and deforming windows.

669

670 We also wrote custom software for performing the PIV analysis on the light-sheet  
671 microscopy data. This software is available upon request. From the PIV results,  
672 calculating the strain rate is then calculated by taking the spatial derivative of the PIV  
673 field after Gaussian smoothing (in both space and time) to reduce effects of noise.

674

## 675 Modeling

676 The experimental velocity field extracted from the PIV analysis was mapped onto the  
677 closest nodes of the FE model of the VNC (**Figure 3F** and **Figure S3C**), which uses an  
678 initial geometry that resembles the VNC before condensation. Mechanical equilibrium is  
679 imposed in order to find the deformation of the whole computational domain.

680 A simple Maxwell rheological model was used for computing the stress values. After the  
681 FE discretization with 15800 linear hexahedral elements (**Figure S3C**), Cauchy's  
682 equilibrium equation  $\nabla \cdot \sigma = 0$  yields a system of ordinary differential equations (ODEs) in  
683 terms of the nodal displacement vector  $u$ :

$$684 \quad C \frac{du}{dt} + Ku = 0 \quad \text{Eq. (8)}$$

685 where  $C$  is the matrix with viscous contributions and  $K$  is the stiffness matrix gathering  
686 the measured elastic properties of the material. We used a Young modulus of  $E=75$  Pa  
687 and a viscous coefficient  $\eta=500$  Pa.s, which gives a similar characteristic time to the one  
688 measured through laser ablation (**Figure 3E**). The ODE system in Eq. (8) was integrated  
689 with an implicit second order accurate Crank-Nicholson scheme. The mapping of the  
690 velocities and the implementation of the FE model were done in a custom code in Matlab.

691 After imposition of the measured velocity field, we interpreted the resulting viscoelastic  
692 stresses of the model as the active stress field of the tissue, necessary for undergoing the  
693 condensation process. From these total stresses in the three-dimensional domain of the  
694 VNC, we extracted the compressive stress peaks along the AP axis, and fitted their  
695 evolution with a fourth inverse degree polynomial (see **Figure 3F** showing the fitted lines,  
696 and **Figure S3D** also showing the stress peaks on the kymograph). Stress peaks evolve  
697 spatially, with a magnitude that is maintained due to the VNC condensation and  
698 concomitant tissue relaxation.

699 Characteristic times  $\tau$  in **Figure 3E** have been computed by fitting the gap  $d(t)$  in the  
700 recoil with an exponential function  $d(t) = Ae^{-t/\tau} + B$ .

701 The stability analysis shown in **Figure 4** is computed from the characteristic equation of  
702 the system of delay differential equations in Eq. (1) and (2) (see (Dawi and Munoz, 2021)  
703 for further references).

704

705

## 706 **ACKNOWLEDGEMENTS**

707

708 We would like to thank Christian Klämbt, Nicholas Tolwinski and Pavel Tomancak for  
709 critical reading of the manuscript, Elena Rebollo for her constant help and support at the  
710 Molecular Imaging Platform of the IBMB and Stephan Grill, MPI-CBG, for providing  
711 access to the laser ablation microscope.

712 KK and EMB are supported by grants BFU2017-82876-P of the Spanish Ministry of  
713 Research and Development, 2017 SGR 1199 GRC of the Generalitat de Catalunya and  
714 2014 Fundació Ramon Areces to EMB. Work in the laboratory of TES (PT, AS and ST)  
715 was supported by a Singapore NRF Fellowship (2012NRF-NRFF001-094), an HFSP  
716 Young Investigator Grant (RGY0083/2016) and MBI Core funding. IJ and DN were  
717 supported by the Spanish Ministry of Science, Innovation and Universities (MICINN)  
718 under grant DPI2017-83721-P and the European Union's Horizon 2020 Research and  
719 Innovation Program under the Marie Skłodowska-Curie grant 812772. JJM is financially  
720 supported by the Spanish Ministry of Science, Innovation and Universities (MICINN)



721 and by the Generalitat de Catalunya, under the grants DPI2016-74929-R and 2017 SGR  
722 1278, respectively.

723

724

725 FIGURES AND LEGENDS

726

# Figure 1

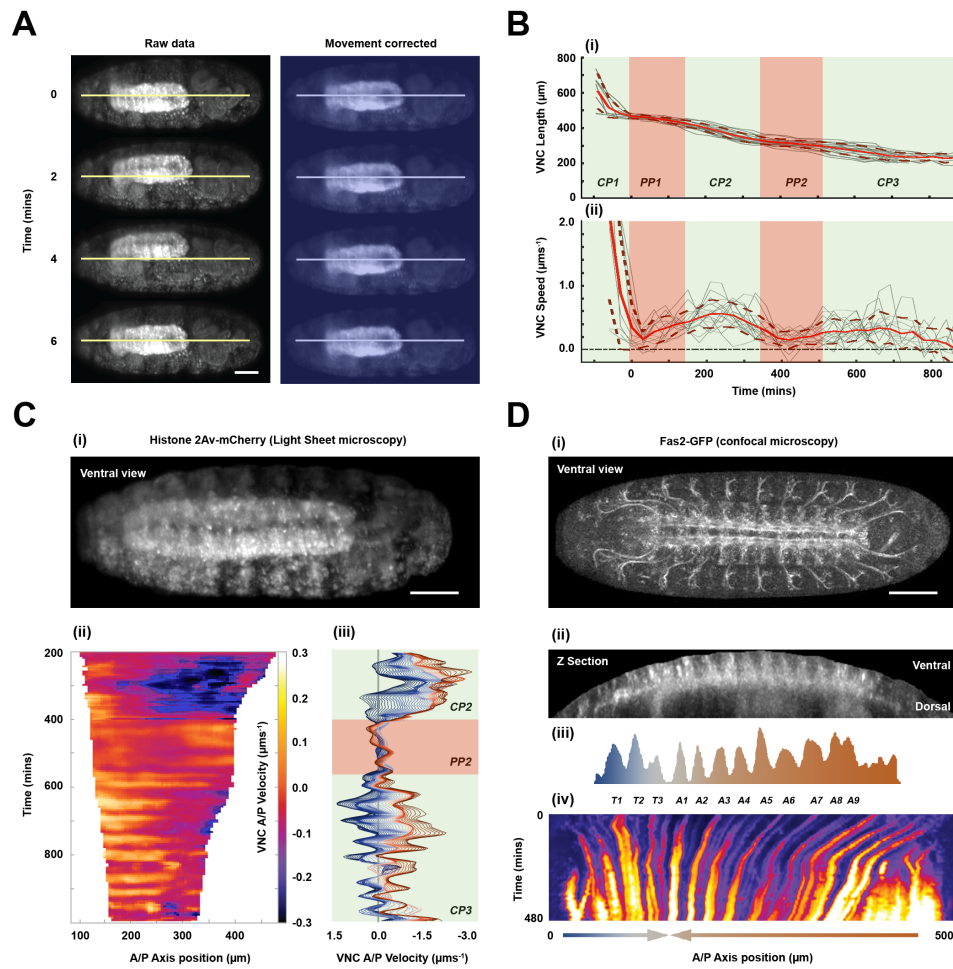

727

728

729 **Figure 1: Dynamics of VNC condensation**

730 **A)** Snapshots at 2-minute intervals from a time lapse (**Movie S2**) recorded by multi-view  
731 light-sheet imaging of a live Histone 2Av-mCherry embryo (ventral view – late stage 17).  
732 mCherry labeling marks all nuclei and was used to correct the embryo twitching (see  
733 Experimental Procedures); raw data is shown on the left and “detwitched” images (blue  
734 masked) on the right. In all images, anterior is to the left and posterior to the right. Lines  
735 indicate the ventral midline. Scale bar 50  $\mu\text{m}$ . **B)** Quantification of VNC length (**i**) and  
736 condensation speed (**ii**) as function of time. Condensation (CP1, CP2 and CP3) and pause  
737 (PP1 and PP2) phases are masked in pale green and red respectively. As a convention for  
738 this and all subsequent figures (unless stated otherwise),  $t=0$  corresponds to the onset of  
739 the VNC pause phase (PP1), at the end of germ band retraction. Means (solid) and SD  
740 (dashed) are represented by red lines. Gray lines represent individual embryos ( $n=11$   
741 embryos). **C)** Condensation speed spatiotemporal dynamics. **(i)** Snapshot of a live  
742 Histone 2Av-mCherry embryo monitored by light-sheet imaging at stage 16. Scale bar  
743 50  $\mu\text{m}$ . **(ii)** Velocity kymograph derived from PIV analysis (Experimental Procedures)  
744 along the VNC. For this and all subsequent figures, position=0 along the AP axis  
745 corresponds to the hinge between the brain lobes and the VNC proper. Time axis (top to  
746 bottom) was defined as in **(B)**. Color-coded positive and negative values of velocity  
747 correspond to posterior-ward and anterior-ward displacements respectively. **(iii)**  
748 Representation of velocity profiles along the whole condensation process (CP2, PP2 and  
749 CP3), with 5-minute resolution, for all points along the AP axis from the most anterior  
750 (darkest blue) to the most posterior (darkest red lines) VNC positions. **D)** Kymograph  
751 along the VNC length from a live embryo expressing Fas2-GFP. **(i)** Ventral view from a  
752 confocal microscopy acquisition (**Movie S3**), at stage 16. Scale bar 50  $\mu\text{m}$ . **(ii)** Stage 16  
753 embryonic VNC, re-sliced over the Z-axis. **(iii)** Fluorescence intensity peaks mark  
754 individual segments landmarks (color coded as in **(C)**). Time and AP axis positions are  
755 as in **(B)** and **(C)**. **(iv)** Kymograph of condensation, with arrows denoting condensation  
756 direction.

757

## Figure 2

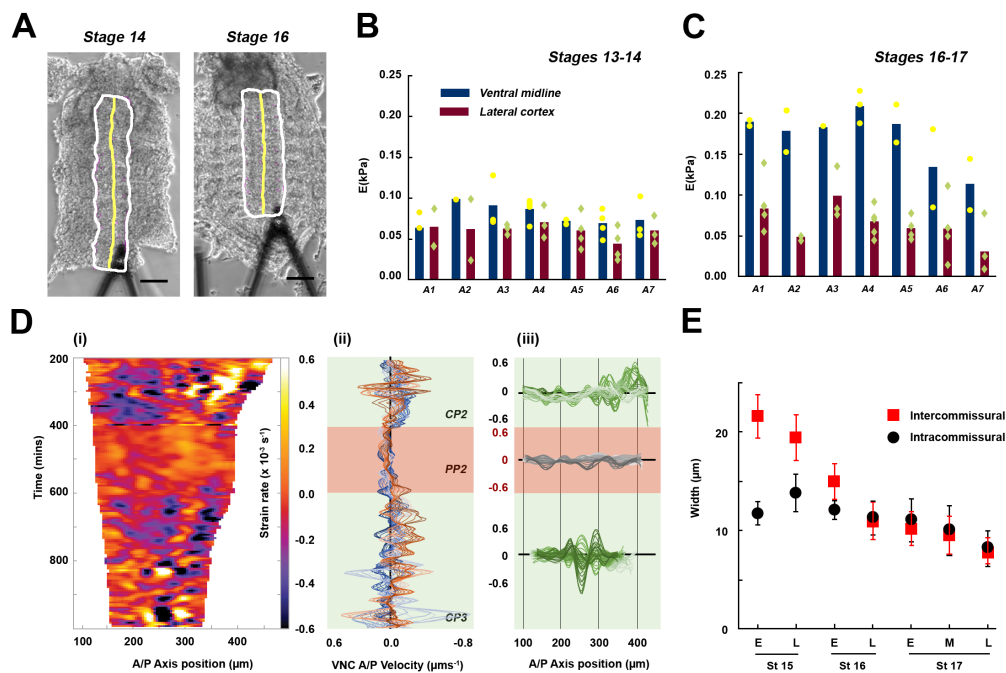

758

759 **Figure 2: Characterization of the VNC material properties and local dynamics along**  
760 **its condensation**

761 **A)** Representative images of flat dissected embryos in stages 14 and stages 16,  
762 respectively. VNC perimeter (white line) and midline (yellow line) are highlighted, with  
763 the AFM cantilever head shown. Anterior is to the top. Scale bar 50  $\mu\text{m}$ . **B)** Measured  
764 tissue stiffness ( $E$ ) for dissected VNC at early stages (13-14). Bars denote mean values at  
765 each abdominal segment A1 to A7. Mean tissue stiffness was measured at the midline  
766 (blue) and at lateral positions of the cortex (red). Dots and diamonds correspond to  
767 individual measurements. **C)** as **(B)** but for later, stage 16-17, samples. **D) (i)** Kymograph

768 of VNC strain rates, from data in **Figure 1C** (see Experimental Procedures). **(ii)**  
769 Representation of strain rates profiles during condensation (CP2, PP2 and CP3), with 5-  
770 minute resolution, from the most anterior (darkest blue line) to the most posterior (darkest  
771 red line) VNC positions. **(iii)** Distribution of strains in VNC along the AP- axis for all  
772 time points (earliest light to latest dark lines) during the phases CP2 (green), PP2 (gray)  
773 and CP3 (green). **E)** Average size (and SD) of intra- and inter-commissural domains from  
774 early (E) and late (L) stage 15, early (E) and late (L) stage 16 and early (E), middle (M)  
775 and late (L) stage 17 embryos as the VNC condenses. Data was collected from 7-10  
776 measurements per time point from two embryos.

777

## Figure 3

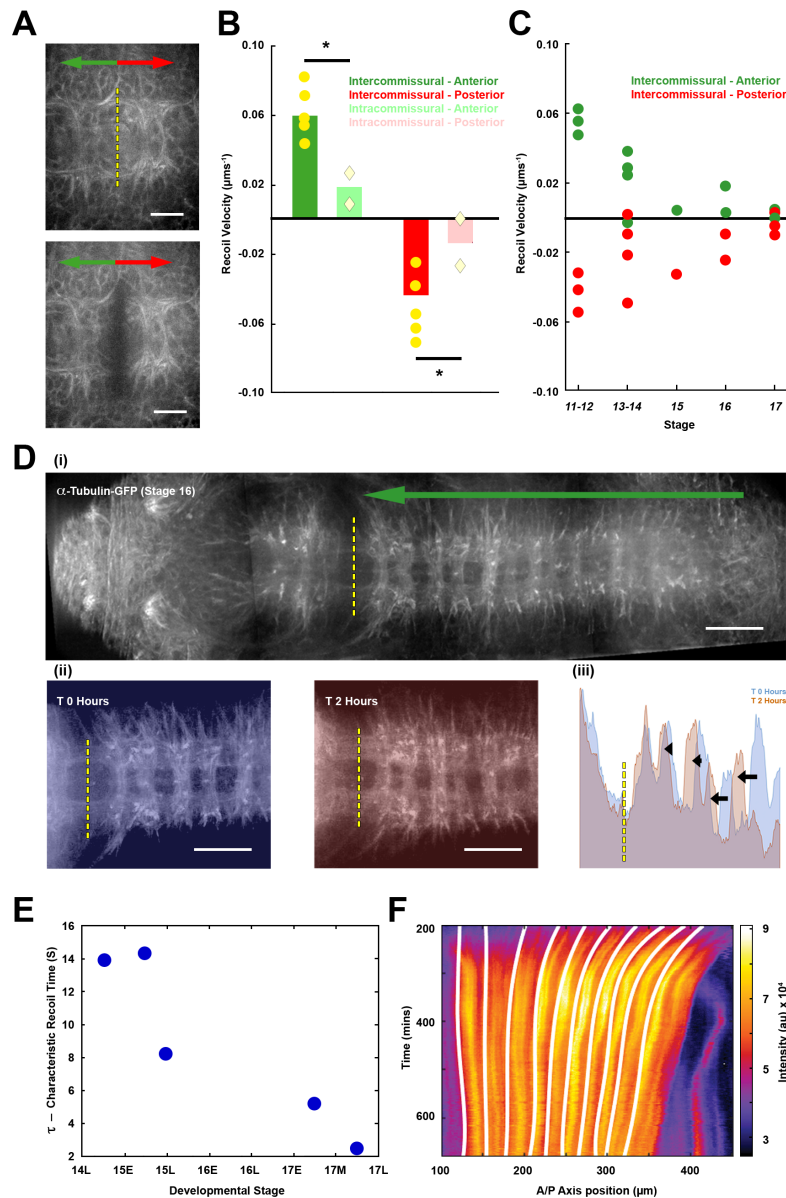

778

779 **Figure 3: VNC response to laser microsurgery during condensation and tissue**  
 780 **tension**

781 **A)** Representative images of stage 14 embryos, expressing alpha Tubulin-GFP, before  
 782 and after laser ablation. The yellow dashed line highlights the position of the laser cut

783 (intercommissural), while green (anterior) and red (posterior) arrows indicate tissue recoil  
784 directionality (**Movie S4**). Scale bar 10  $\mu\text{m}$ . **B**) Tissue recoil velocity after ablation at  
785 intercommissural (dark) and intracommissural (pale) domains, on stage 14 embryos. Bars  
786 represent mean recoil velocity of anteriorly (green) and posteriorly (red) retracting tissue.  
787 Individual measurements are denoted by yellow dots and diamonds. \*  $p < 0.05$ . **C**) Recoil  
788 velocity of anteriorly (green) and posteriorly (red) retracting domains after VNC ablation  
789 at different stages of embryonic development (n=12 embryos). **D**) **(i)** tiled image of a  
790 stage 16 embryo expressing alpha Tubulin-GFP after laser cutting the intercommissural  
791 domain between abdominal segments A1 and A2. The green arrow marks the direction  
792 of tissue condensation. **(ii)** Snapshots, immediately post-ablation (masked blue), and 2  
793 hours later (masked red), from **Movie S5**. Scale bar 20  $\mu\text{m}$ . **(iii)** Superimposed  
794 fluorescence intensity profiles of both time points. Black arrows indicate the magnitude  
795 of the anterior-ward displacement of individual segmental landmarks over the analyzed  
796 period. **E**) Characteristic recoil time  $\tau$  at different embryonic stages computed from the  
797 rate of recoil after laser ablation at the intercommissural domain. **F**) Kymograph of the  
798 VNC during condensation (Fas2-GFP expressing embryo). White curves correspond to  
799 fourth order polynomial fitting of the points of maximum compression as deduced from  
800 the viscoelastic FE model of the VNC (Experimental Procedures). (See also **Figure S3E**  
801 and **Movie S6**).

802

## Figure 4

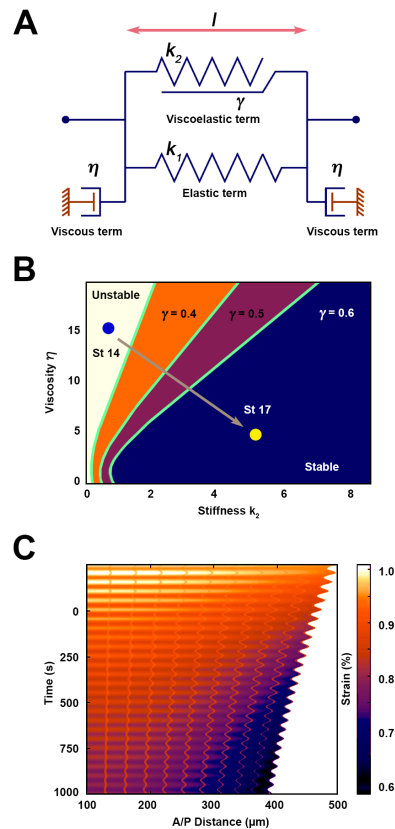

803

### 804 **Figure 4: Rheological model of VNC condensation**

805 **A)** Scheme of one-dimensional rheological model. A viscoelastic term with variable rest-  
806 length  $l$  has stiffness  $k_2$  and remodeling rate  $\gamma$  (see Eq. (1) in Results). The VNC is taken  
807 to have an elastic component in parallel, with stiffness  $k_1$ . The model also includes viscous  
808 contact to the external environment, denoted by  $\eta$ . **B)** Phase diagram in the parameter  
809 space  $k_2 - \eta$ , showing that reduction of  $\eta$  and increase of  $k_2$  stabilizes the oscillatory  
810 behavior. Points St 14 and St 17 represent material values and transition from early to  
811 later stages of VNC development, with a stabilizing effect. **C)** Kymograph of numerical  
812 simulation showing the oscillatory behavior of strains as a function of time. Simulations  
813 with other parameter values showing unstable responses are shown in **Figure S4**.



814

## Figure 5

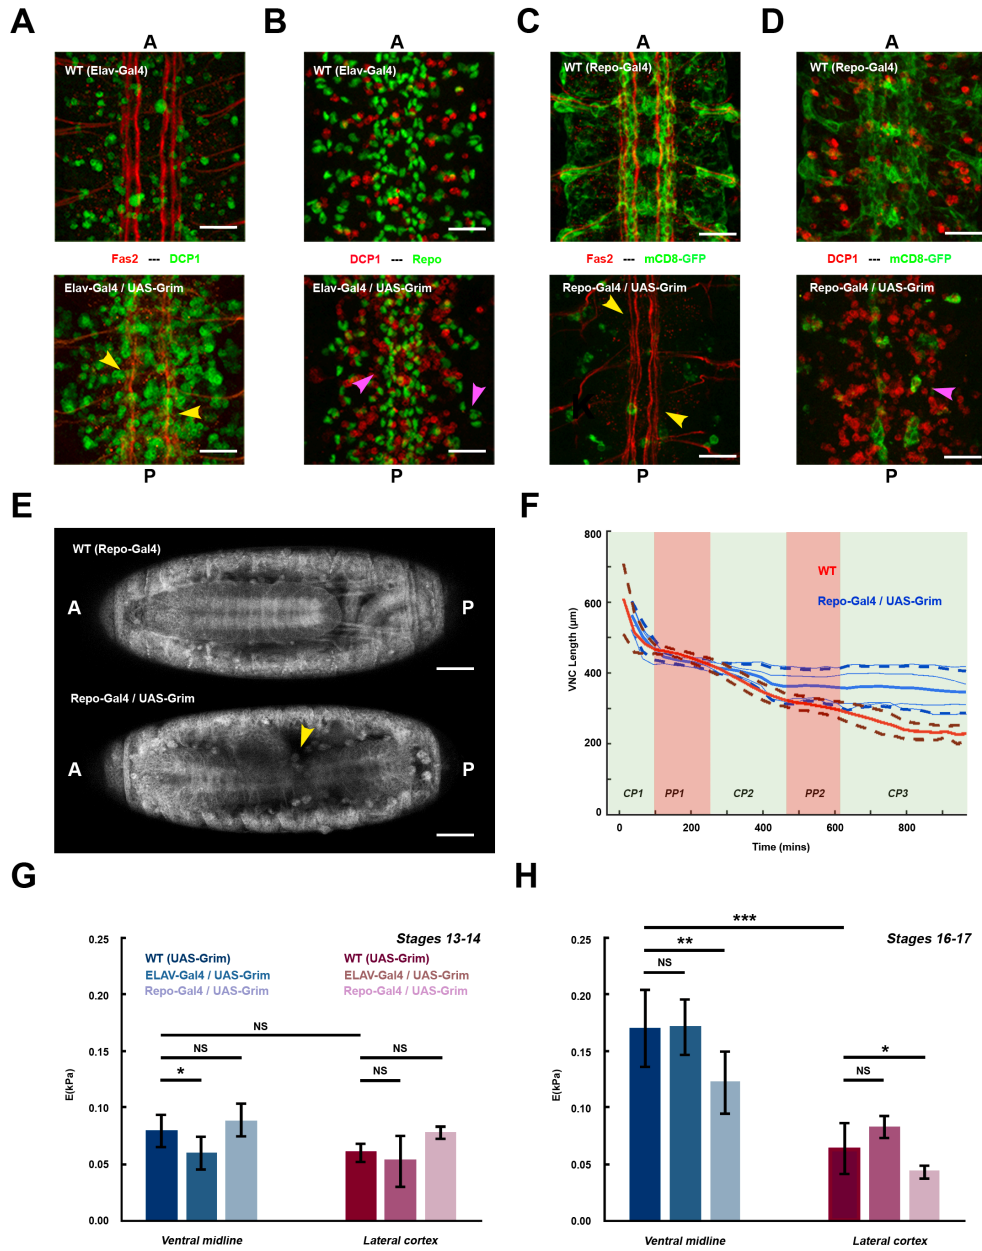

815

816

817 **Figure 5: Both neurons and glia participate in the architectural organization of the**  
818 **VNC and its condensation**

819 **A)** CNS Flat-preps of WT (top) and *Elav-Gal4>UAS-Grim* (bottom) embryos, at stage  
820 16, immunostained for Fas2 (red) and Dcp1 (green). Yellow arrowheads point to the  
821 disrupted axonal network. **B)** Embryos of the same genotype as in **(A)**, immunostained  
822 for Dcp1 (red) and Repo (green). Pink arrowheads point to misplaced glia. **C)** CNS Flat-  
823 preps of WT (top) and *Repo-Gal4:UAS-mCD8-GFP>UAS-Grim* (bottom) embryos, at  
824 stage 16, immunostained for Fas2 (red) and GFP (green). Yellow arrowheads point to the  
825 disrupted axonal network. **D)** Embryos of the same genotype as in **(C)**, immunostained  
826 for Dcp1 (red) and GFP (green). Pink arrowhead points to surviving glia. Scale bar 10  
827  $\mu\text{m}$  in **A-D**. **E)** Snapshots from time lapse recordings of WT (Top) and *Repo-Gal4>UAS-*  
828 *Grim* (bottom) embryos, in an alpha Tubulin-GFP background (ventral view –stage 17)  
829 **(Movie S7)**. Yellow arrowhead points to the VNC misshaped buckling. Scale bar 50  $\mu\text{m}$ .  
830 AP axis orientation is indicated. **F)** Quantification of VNC length as a function of  
831 developmental time in WT (red, n=11) and *Repo-Gal4>UAS-Grim* (blue, n=4) embryos  
832 marked with *elav:mCD8-GFP* by confocal imaging. Solid and dashed lines show mean  
833 and SD values respectively. **G)** Tissue stiffness (E) measured by AFM for dissected  
834 VNCs at early stages (13-14), from WT, *Elav-Gal4>UAS-Grim* and *Repo-Gal4>UAS-*  
835 *Grim* embryos. Bars denote mean values at the ventral midline (blue) and at lateral cortex  
836 areas (red). \* $p < 0.05$  , \*\* $p < 10^{-2}$  and \*\*\* $p < 10^{-3}$ . **H)** As **(G)** but for later stage 16-17  
837 embryos.

838

## Figure 6

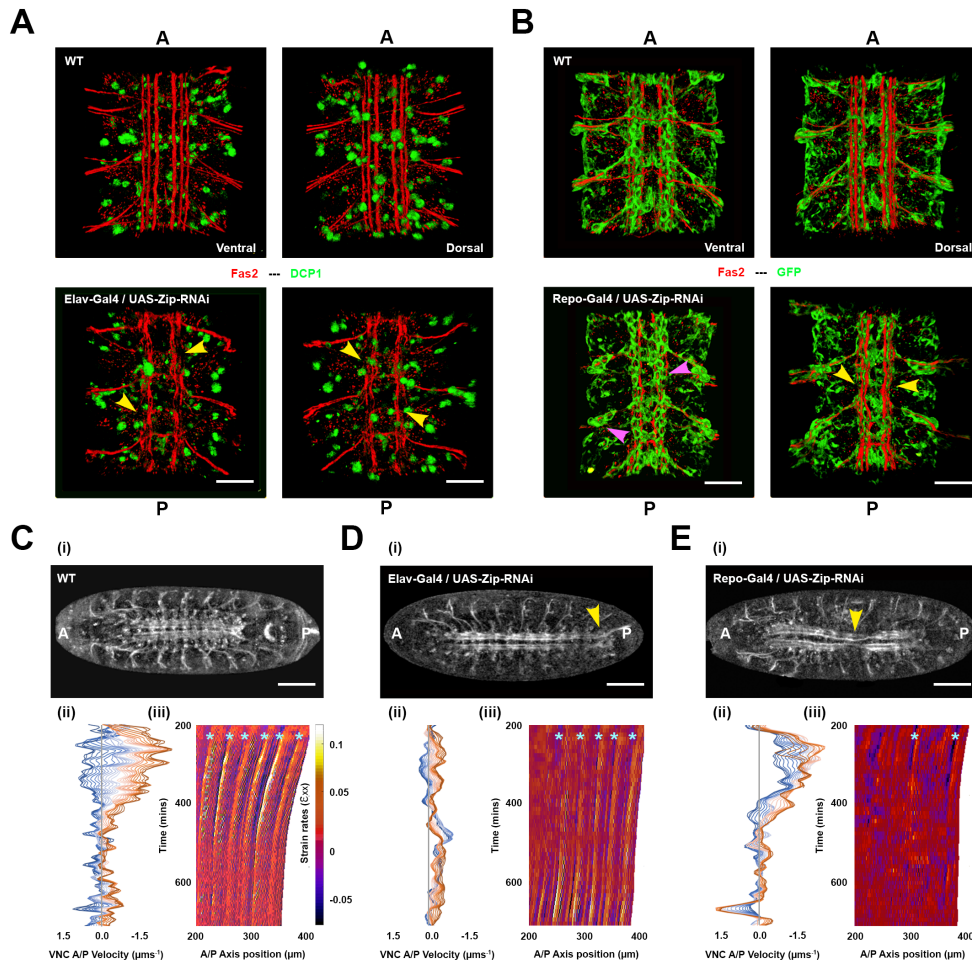

839

840 **Figure 6: Active contractility in neurons and glia have distinct roles for VNC**  
 841 **architecture and condensation.**

842 **A)** Ventral and Dorsal 3D views of dissected, stage 16, WT (top) and Elav-Gal4>UAS-  
 843 Zip-RNAi (bottom) embryos, immunostained for Fas2 (red) and Dcp1 (green). Yellow  
 844 arrowheads point to the disrupted axonal network. **B)** Ventral and Dorsal 3D views,  
 845 equivalent to (A), of stage 16, WT (top) and Repo-Gal4:UAS-mCD8-GFP>UAS-Zip-  
 846 RNAi (bottom) embryos, immunostained for Fas2 (red) and GFP (green). Pink  
 847 arrowheads point to misplaced glia. Yellow arrowheads point to the disrupted axonal

848 network. **A-B** Scale bar 10  $\mu\text{m}$ . **C-E**) Condensation dynamics in control (**C**), Elav-  
849 Gal4>UAS-Zip-RNAi (**D**) and Repo-Gal4>UAS-Zip-RNAi (**E**) embryos (**Movie S9**). **(i)**  
850 Snapshots of live embryos, expressing Fas2-GFP, monitored by confocal imaging, at  
851 stage 17. Yellow arrowheads point to the posterior tip of the uncondensed VNC (**D**) and  
852 to the VNC misshaped buckling (**E**). Anterior is to the left. Scale bar 50  $\mu\text{m}$ . **(ii)**  
853 Representation of velocity profiles during condensation along the AP axis, from the most  
854 anterior (darkest blue) to the most posterior (darkest red line) VNC positions (as in **Figure**  
855 **1C**). **(iii)** Kymograph of strain rates along the VNC (as **Figure 2D**). Cyan marks point to  
856 strain oscillations, which are strongly diminished upon reduction of glia contractility.

857

## Figure 7

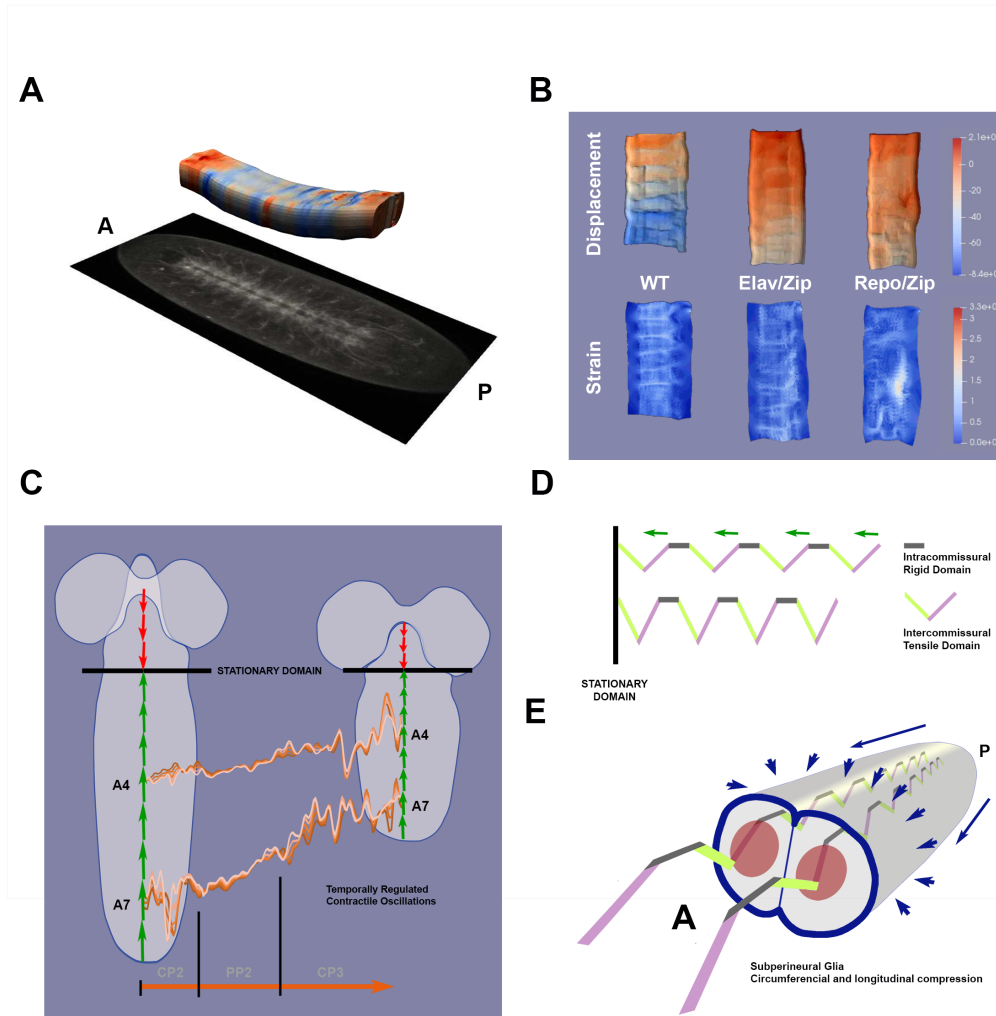

858

859 **Figure 7: Neurons and Glia cooperate to lead the oscillatory character of VNC**  
860 **condensation**

861 **A)** Snapshot from the 3D representation (**Movie S10**) of the segmental 2D strain pattern  
862 of the VNC during condensation, in WT animals. The actual 3D meshwork (top) is  
863 aligned to the corresponding raw image (bottom). AP axis orientation is indicated. **B)**  
864 Displacements and strains along the VNC, in WT embryos and in embryos with pan-

865 neural (Elav-Gal4>UAS-Zip-RNAi) or pan-glial (Repo-Gal4>UAS-Zip-RNAi) non  
866 muscle Myosin II knockdown, at equivalent developmental times. (Snapshots from  
867 **Movie S11**). **C**) Cartoon summarizing the VNC condensation oscillatory regime during  
868 the CP2 and CP3 stages (examples at the level of the abdominal segments A4 and A7,  
869 data from **Movie S2** – see **Figure 1C**), as well as pointing to the opposing displacements  
870 of the thoracic (red) and abdominal (green) segments towards the central stationary  
871 domain. **D**) Cartoon presenting the segmentally iterated intercommissural and  
872 intracommissural domains of the axonal network before (top) and after (bottom)  
873 condensation. Their mechanical properties (rigid or tensile) are shown. This  
874 representation depicts the first three abdominal segments actively contracting (green  
875 arrows) towards the thorax/abdomen stationary domain. **E**) Cartoon presenting in 3D the  
876 VNC internal segmentally iterated axonal network (described in **D**) surrounded by the  
877 glial shell (Subperineural Glia) with centripetal and longitudinal contractile capability  
878 (blue arrows). AP axis orientation is indicated.

879

## 880 REFERENCES

881

882 Amourda, C., and Saunders, T.E. (2017). Gene expression boundary scaling and organ  
883 size regulation in the *Drosophila* embryo. *Dev Growth Differ* 59, 21-32.

884 Anava, S., Greenbaum, A., Ben Jacob, E., Hanein, Y., and Ayali, A. (2009). The  
885 regulative role of neurite mechanical tension in network development. *Biophys J* 96,  
886 1661-1670.

887 Baines, R.A., and Bate, M. (1998). Electrophysiological development of central neurons  
888 in the *Drosophila* embryo. *J Neurosci* 18, 4673-4683.

889 Beckervordersandforth, R.M., Rickert, C., Altenhein, B., and Technau, G.M. (2008).  
890 Subtypes of glial cells in the *Drosophila* embryonic ventral nerve cord as related to  
891 lineage and gene expression. *Mech Dev* 125, 542-557.

892 Boix-Fabres, J., Karkali, K., Martin-Blanco, E., and Rebollo, E. (2019). Automated  
893 Macro Approach to Remove Vitelline Membrane Autofluorescence in *Drosophila*  
894 Embryo 4D Movies. *Methods Mol Biol* 2040, 155-175.

895 Bullmore, E., and Sporns, O. (2012). The economy of brain network organization. *Nat*  
896 *Rev Neuro* 13, 336-349.

- 897 Bullock, T.H., and Horridge, G.A. (1965). Structure and function in the nervous systems  
898 of invertebrates (San Francisco,: W. H. Freeman).
- 899 Buszczak, M., Paterno, S., Lighthouse, D., Bachman, J., Planck, J., Owen, S., Skora,  
900 A.D., Nystul, T.G., Ohlstein, B., Allen, A., *et al.* (2007). The carnegie protein trap library:  
901 a versatile tool for *Drosophila* developmental studies. *Genetics* *175*, 1505-1531.
- 902 Cajal, S.R.y. (1899). *Textura del Sistema Nervioso del Hombre y de los Vertebrados*  
903 (Madrid, Spain: Nicolas Moya).
- 904 Campos-Ortega, J.A., and Hartenstein, V. (1985). The embryonic development of  
905 *Drosophila melanogaster* (Berlin ; New York: Springer-Verlag).
- 906 Cavanaugh, K.E., Staddon, M.F., Munro, E., Banerjee, S., and Gardel, M.L. (2020).  
907 RhoA Mediates Epithelial Cell Shape Changes via Mechanosensitive Endocytosis. *Dev*  
908 *Cell* *52*, 152-166 e155.
- 909 Chen, P., Nordstrom, W., Gish, B., and Abrams, J.M. (1996). *grim*, a novel cell death  
910 gene in *Drosophila*. *Genes & Dev* *10*, 1773-1782.
- 911 Christley, S., Alber, M.S., and Newman, S.A. (2007). Patterns of mesenchymal  
912 condensation in a multiscale, discrete stochastic model. *PLoS Comput Biol* *3*, e76.
- 913 Clement, R., Dehapiot, B., Collinet, C., Lecuit, T., and Lenne, P.F. (2017). Viscoelastic  
914 Dissipation Stabilizes Cell Shape Changes during Tissue Morphogenesis. *Curr Biol* *27*,  
915 3132-3142 e3134.
- 916 Dawi, M.A., and Munoz, J.J. (2021). Stability bounds of a delay visco-elastic rheological  
917 model with substrate friction. *arXiv* *2101.07372*.
- 918 DeLise, A.M., Fischer, L., and Tuan, R.S. (2000). Cellular interactions and signaling in  
919 cartilage development. *Osteoarthritis Cartilage* *8*, 309-334.
- 920 Doubrovinski, K., Swan, M., Polyakov, O., and Wieschaus, E.F. (2017). Measurement of  
921 cortical elasticity in *Drosophila melanogaster* embryos using ferrofluids. *PNAS USA*  
922 *114*, 1051-1056.
- 923 Erneux, T. (2009). *Applied delay differential equations* (New York: Springer).
- 924 Evans, I.R., Hu, N., Skaer, H., and Wood, W. (2010). Interdependence of macrophage  
925 migration and ventral nerve cord development in *Drosophila* embryos. *Development* *137*,  
926 1625-1633.
- 927 Franze, K. (2013). The mechanical control of nervous system development. *Development*  
928 *140*, 3069-3077.

- 929 Franze, K., Janmey, P.A., and Guck, J. (2013). Mechanics in neuronal development and  
930 repair. *Annu Rev Biomed Eng* 15, 227-251.
- 931 Frenz, D.A., Jaikaria, N.S., and Newman, S.A. (1989). The mechanism of precartilag-  
932 eous mesenchymal condensation: a major role for interaction of the cell surface with the  
933 amino-terminal heparin-binding domain of fibronectin. *Dev Biol* 136, 97-103.
- 934 Hall, B.K., and Miyake, T. (2000). All for one and one for all: condensations and the  
935 initiation of skeletal development. *BioEssays* 22, 138-147.
- 936 Hartenstein, V., and Wodarz, A. (2013). Initial neurogenesis in *Drosophila*. *Wiley*  
937 *Interdiscip Rev Dev Biol* 2, 701-721.
- 938 Heisenberg, C.-P., and Bellaïche, Y. (2013). Forces in Tissue Morphogenesis and  
939 Patterning. *Cell* 153, 948-962.
- 940 Hogan, B.L. (1999). Morphogenesis. *Cell* 96, 225-233.
- 941 Ito, K., Urban, J., and Technau, G.M. (1995). Distribution, classification, and  
942 development of *Drosophila* glial cells in the late embryonic and early larval ventral nerve  
943 cord. *Roux Arch Dev Biol* 204, 284-307.
- 944 Jorba, I., Uriarte, J.J., Campillo, N., Farre, R., and Navajas, D. (2017). Probing  
945 Micromechanical Properties of the Extracellular Matrix of Soft Tissues by Atomic Force  
946 Microscopy. *J Cell Physiol* 232, 19-26.
- 947 Karkali, K., Saunders, T.E., Vernon, S.W., Baines, R.A., Panayotou, G., and Martín-  
948 Blanco, E. (2020). JNK signaling in pioneer neurons directs the architectural organization  
949 of the CNS and coordinates the motor activity of the *Drosophila* embryo. *bioRxiv*,  
950 092486.
- 951 Khalilgharibi, N., Fouchard, J., Asadipour, N., Barrientos, R., Duda, M., Bonfanti, A.,  
952 Yonis, A., Harris, A., Mosaffa, P., and Fujita, Y. (2019). Stress relaxation in epithelial  
953 monolayers is controlled by the actomyosin cortex. *Nat Phys* 15, 839-847.
- 954 Kilinc, D. (2018). The Emerging Role of Mechanics in Synapse Formation and Plasticity.  
955 *Front Cell Neurosci* 12, 483.
- 956 Krzic, U., Gunther, S., Saunders, T.E., Streichan, S.J., and Hufnagel, L. (2012).  
957 Multiview light-sheet microscope for rapid in toto imaging. *Nat Methods* 9, 730-733.
- 958 Landgraf, M., Bossing, T., Technau, G.M., and Bate, M. (1997). The origin, location, and  
959 projections of the embryonic abdominal motorneurons of *Drosophila*. *J Neurosci* 17,  
960 9642-9655.



- 961 Landgraf, M., Sanchez-Soriano, N., Technau, G.M., Urban, J., and Prokop, A. (2003).  
962 Charting the *Drosophila* neuropile: a strategy for the standardised characterisation of  
963 genetically amenable neurites. *Dev Biol* 260, 207-225.
- 964 LeGoff, L., and Lecuit, T. (2015). Mechanical Forces and Growth in Animal Tissues.  
965 Cold Spring Harb Perspect Biol 8, a019232.
- 966 Li, Y., Muffat, J., Omer, A., Bosch, I., Lancaster, M.A., Sur, M., Gehrke, L., Knoblich,  
967 J.A., and Jaenisch, R. (2017). Induction of Expansion and Folding in Human Cerebral  
968 Organoids. *Cell Stem Cell* 20, 385-396 e383.
- 969 Lin, D.M., Fetter, R.D., Kopczynski, C., Grenningloh, G., and Goodman, C.S. (1994).  
970 Genetic analysis of Fasciclin II in *Drosophila*: defasciculation, refasciculation, and  
971 altered fasciculation. *Neuron* 13, 1055-1069.
- 972 Lynch, H.E., Crews, S.M., Rosenthal, B., Kim, E., Gish, R., Echiverri, K., and Hutson,  
973 M.S. (2013). Cellular mechanics of germ band retraction in *Drosophila*. *Dev Biol* 384,  
974 205-213.
- 975 Mammoto, T., and Ingber, D.E. (2010). Mechanical control of tissue and organ  
976 development. *Development* 137, 1407-1420.
- 977 Martinek, N., Shahab, J., Saathoff, M., and Ringuette, M. (2008). Haemocyte-derived  
978 SPARC is required for collagen-IV-dependent stability of basal laminae in *Drosophila*  
979 embryos. *J Cell Sci* 121, 1671-1680.
- 980 Mayer, M., Depken, M., Bois, J.S., Julicher, F., and Grill, S.W. (2010). Anisotropies in  
981 cortical tension reveal the physical basis of polarizing cortical flows. *Nature* 467, 617-  
982 621.
- 983 Meyer, S., Schmidt, I., and Klambt, C. (2014). Glia ECM interactions are required to  
984 shape the *Drosophila* nervous system. *Mech Dev* 133, 105-116.
- 985 Miller, C.J., and Davidson, L.A. (2013). The interplay between cell signalling and  
986 mechanics in developmental processes. *Nat Rev Genet* 14, 733-744.
- 987 Mongera, A., Rowghanian, P., Gustafson, H.J., Shelton, E., Kealhofer, D.A., Carn, E.K.,  
988 Serwane, F., Lucio, A.A., Giammona, J., and Campas, O. (2018). A fluid-to-solid  
989 jamming transition underlies vertebrate body axis elongation. *Nature* 561, 401-405.
- 990 Muñoz, J.J., Dingle, M., and Wenzel, M. (2018). Mechanical oscillations in biological  
991 tissues as a result of delayed rest-length changes. *Phys Rev E* 98, 052409.

- 992 Notbohm, J., Banerjee, S., Utuje, K.J.C., Gweon, B., Jang, H., Park, Y., Shin, J., Butler,  
993 J.P., Fredberg, J.J., and Marchetti, M.C. (2016). Cellular Contraction and Polarization  
994 Drive Collective Cellular Motion. *Biophys J* *110*, 2729-2738.
- 995 Oliveira, M.M., Shingleton, A.W., and Mirth, C.K. (2014). Coordination of wing and  
996 whole-body development at developmental milestones ensures robustness against  
997 environmental and physiological perturbations. *PLoS Genet* *10*, e1004408.
- 998 Olofsson, B., and Page, D.T. (2005). Condensation of the central nervous system in  
999 embryonic *Drosophila* is inhibited by blocking hemocyte migration or neural activity.  
1000 *Dev Biol* *279*, 233-243.
- 1001 Page, D.T., and Olofsson, B. (2008). Multiple roles for apoptosis facilitating  
1002 condensation of the *Drosophila* ventral nerve cord. *Genesis* *46*, 61-68.
- 1003 Petridou, N.I., and Heisenberg, C.P. (2019). Tissue rheology in embryonic organization.  
1004 *EMBO J* *38*, e102497.
- 1005 Petrolli, V., Le Goff, M., Tadrous, M., Martens, K., Allier, C., Mandula, O., Herve, L.,  
1006 Henkes, S., Sknepnek, R., Boudou, T., *et al.* (2019). Confinement-Induced Transition  
1007 between Wavelike Collective Cell Migration Modes. *Phys Rev Lett* *122*, 168101.
- 1008 Peyret, G., Mueller, R., d'Alessandro, J., Begnaud, S., Marcq, P., Mege, R.M., Yeomans,  
1009 J.M., Doostmohammadi, A., and Ladoux, B. (2019). Sustained Oscillations of Epithelial  
1010 Cell Sheets. *Biophys J* *117*, 464-478.
- 1011 Pipa, R.L. (1973). Proliferation, movement, and regression of neurons during the  
1012 postembryonic development of insects. In *Developmental Neurobiology of Arthropods*  
1013 (Cambridge: Cambridge University Press).
- 1014 Redies, C., and Puelles, L. (2001). Modularity in vertebrate brain development and  
1015 evolution. *BioEssays* *23*, 1100-1111.
- 1016 Roig-Puiggros, S., Vigouroux, R.J., Beckman, D., Bocai, N.I., Chiou, B., Davimes, J.,  
1017 Gomez, G., Grassi, S., Hoque, A., Karikari, T.K., *et al.* (2020). Construction and  
1018 reconstruction of brain circuits: normal and pathological axon guidance. *J Neurochem*  
1019 *153*, 10-32.
- 1020 Saunders, T.E., and Ingham, P.W. (2019). Open questions: how to get developmental  
1021 biology into shape? *BMC Biol* *17*, 17.

- 1022 Schindelin, J., Arganda-Carreras, I., Frise, E., Kaynig, V., Longair, M., Pietzsch, T.,  
1023 Preibisch, S., Rueden, C., Saalfeld, S., Schmid, B., *et al.* (2012). Fiji: an open-source  
1024 platform for biological-image analysis. *Nat Methods* 9, 676-682.
- 1025 Schulze, K.L., Broadie, K., Perin, M.S., and Bellen, H.J. (1995). Genetic and  
1026 electrophysiological studies of *Drosophila* syntaxin-1A demonstrate its role in  
1027 nonneuronal secretion and neurotransmission. *Cell* 80, 311-320.
- 1028 Schwabe, T., Li, X., and Gaul, U. (2017). Dynamic analysis of the mesenchymal-  
1029 epithelial transition of blood-brain barrier forming glia in *Drosophila*. *Biol Open* 6, 232-  
1030 243.
- 1031 Serwane, F., Mongera, A., Rowghanian, P., Kealhofer, D.A., Lucio, A.A., Hockenbery,  
1032 Z.M., and Campas, O. (2017). In vivo quantification of spatially varying mechanical  
1033 properties in developing tissues. *Nat Methods* 14, 181-186.
- 1034 Shklyar, B., Sellman, Y., Shklover, J., Mishnaevski, K., Levy-Adam, F., and Kurant, E.  
1035 (2014). Developmental regulation of glial cell phagocytic function during *Drosophila*  
1036 embryogenesis. *Dev Biol* 393, 255-269.
- 1037 Shyer, A.E., Rodrigues, A.R., Schroeder, G.G., Kassianidou, E., Kumar, S., and Harland,  
1038 R.M. (2017). Emergent cellular self-organization and mechanosensation initiate follicle  
1039 pattern in the avian skin. *Science* 357, 811-815.
- 1040 Singh, P., and Schwarzbauer, J.E. (2012). Fibronectin and stem cell differentiation -  
1041 lessons from chondrogenesis. *J Cell Sci* 125, 3703-3712.
- 1042 Spedden, E., and Staii, C. (2013). Neuron biomechanics probed by atomic force  
1043 microscopy. *Int J Mol Sci* 14, 16124-16140.
- 1044 Staddon, M.F., Cavanaugh, K.E., Munro, E.M., Gardel, M.L., and Banerjee, S. (2019).  
1045 Mechanosensitive Junction Remodeling Promotes Robust Epithelial Morphogenesis.  
1046 *Biophys J* 117, 1739-1750.
- 1047 Stark, M.R., Sechrist, J., Bronner-Fraser, M., and Marcelle, C. (1997). Neural tube-  
1048 ectoderm interactions are required for trigeminal placode formation. *Development* 124,  
1049 4287-4295.
- 1050 Stépán, G. (1989). Retarded dynamical systems: stability and characteristic functions  
1051 (Harlow: Longman Scientific and Technical).
- 1052 Sumi, A., Hayes, P., D'Angelo, A., Colombelli, J., Salbreux, G., Dierkes, K., and Solon,  
1053 J. (2018). Adherens Junction Length during Tissue Contraction Is Controlled by the

- 1054 Mechanosensitive Activity of Actomyosin and Junctional Recycling. *Dev Cell* *47*, 453-  
1055 463 e453.
- 1056 Swanson, L.W. (2007). Quest for the basic plan of nervous system circuitry. *Brain Res*  
1057 *Rev* *55*, 356-372.
- 1058 Technau, G.M. (2008). Brain development in *Drosophila melanogaster*. *Advances in*  
1059 *Experimental Medicine and Biology*, Vol 628 (New York: Springer).
- 1060 Tessier-Lavigne, M., and Goodman, C.S. (1996). The molecular biology of axon  
1061 guidance. *Science* *274*, 1123-1133.
- 1062 Thielicke, W., and Stamhuis, E.J. (2018). The effects of wing twist in slow-speed flapping  
1063 flight of birds: trading brute force against efficiency. *Bioinspir Biomim* *13*, 056015.
- 1064 Vig, D.K., Hamby, A.E., and Wolgemuth, C.W. (2016). On the Quantification of Cellular  
1065 Velocity Fields. *Biophys J* *110*, 1469-1475.
- 1066 Weber, G.F., Bjerke, M.A., and DeSimone, D.W. (2011). Integrins and cadherins join  
1067 forces to form adhesive networks. *J Cell Sci* *124*, 1183-1193.
- 1068 Zhang, H., and Labouesse, M. (2012). Signalling through mechanical inputs: a  
1069 coordinated process. *J Cell Sci* *125*, 3039-3049.
- 1070
